# Supplementary material
Source: publisher figshare collection journal article supplement (https://acs.figshare.com/ndownloader/files/5726166)
Supplement: Supplementary file 1 [file 5726166]

# Is the Linkage Region of Sphingolipids Responsible for Lipid Raft Formation?

Maki Uragami, Nobuya Tokutake, and Steven L. Regen\*

Department of Chemistry and Zettlemoyer Center  
for Surface Studies, Lehigh University,  
Bethlehem, Pennsylvania 18015

## Supporting Information

**General Methods.** Unless stated, otherwise, all reagents were obtained from commercial sources, and used without further purification. Phosphorous trichloride was refluxed and distilled before use. Triethylamine was distilled from  $\text{CaH}_2$  and stored over KOH. Pivaloyl chloride was distilled prior to use. THF, toluene and pyridine were used in an anhydrous form. All  $^1\text{H}$ -,  $^{31}\text{P}$ -, and  $^{13}\text{C}$ -NMR spectra were recorded on a Bruker 360 MHz instrument; chemical shifts are reported in ppm and are referenced to residual solvent. Phosphoric acid was used as external reference for  $^{31}\text{P}$  NMR. *D-erythro*-sphinganine (Avanti Polar Lipids) was used as received.

***N*-Myristoyl-*D*-erythro-Sphinganine (5)** *D*-erythro-sphinganine (1.02 g, 3.38 mmol) was dissolved in 30 mL of THF, followed by addition of 0.95 mL of  $\text{Et}_3\text{N}$  (6.76 mmol, 2eq), and a solution of 1.22 g of *N*-succinimidyl tetradecanoate (3.72 mmol, 1.1eq). After stirring for 15 h, the precipitate was removed by filtration. The organic layer was then concentrated under reduced pressure, and the crude product purified by recrystallization from 5–10 mL of EtOH to give 1.50 g of colorless solid (86%), having  $R_f$  0.47 ( $\text{CHCl}_3/\text{MeOH}$ , 10/1, v/v);  $^1\text{H}$  NMR (360 MHz,  $\text{CDCl}_3$ )  $\delta$ : 6.33 (d,  $J=7.2$  Hz, 1 H), 4.00 (dd,  $J=3.4$ , 10.4 Hz, 1 H), 3.81 (m, 1 H), 3.76 (m, 2 H), 2.21 (t,  $J=7.6$  Hz, 2 H), 1.71 (m, 2 H), 1.62 (m, 2 H), 1.51 (m, 2 H), 1.23 (m, 46 H), 0.85 (t,  $J=6.7$  Hz, 3 H);  $^{13}\text{C}$  NMR (90 MHz,  $\text{CDCl}_3$ )  $\delta$ : 173.7, 74.0, 62.3, 53.7, 45.7, 36.7, 34.3, 31.8, 29.5, 29.2, 25.9, 25.7, 22.6, 14.0; IR  $\nu_{\text{max}}$  (KBr) 3278, 2918, 2850, 1727, 1640, 1552, 1465, 1211, 1072  $\text{cm}^{-1}$ ; HRMS for  $\text{C}_{32}\text{H}_{66}\text{NO}_3$  Calcd: 512.5043. Found: 512.5035.

***N*-Myristoyl-1-*O*-benzoyl-3-triisopropylsilyl-*D*-erythro-sphinganine (6).** Sphinganine **5** (316 mg, 0.62 mmol) was dissolved in 1.0 mL of pyridine, and 15.0 mg (0.31 mmol) of DMAP and 72.0  $\mu\text{L}$  (0.62 mmol) of benzoyl chloride were added, successively. The reaction mixture was stirred for 15 h at room temperature. Removal of solvent under reduced pressure and purification of the residue by column chromatography ( $\text{SiO}_2$ , 30 g,  $\text{CHCl}_3/\text{CH}_3\text{OH}$ , 50/1 and 20/1, v/v) afforded 60.5 mg (19% recovery) of unreacted **5** and 252.3 mg (66%) of a monobenzoylelated product as a colorless solid, having  $R_f$  0.76 ( $\text{CHCl}_3/\text{CH}_3\text{OH}$ , 10/1, v/v);  $^1\text{H}$  NMR (360 MHz,  $\text{CDCl}_3$ )  $\delta$ : 7.99 (d,  $J=5.0$  Hz, 2 H), 7.56 (t,  $J=7.4$  Hz, 1 H), 7.43 (t,  $J=7.5$  Hz, 2 H), 5.97 (d,  $J=8.4$  Hz, 1 H), 4.62 (dd,  $J=6.7$ , 11.7 Hz, 1 H), 4.40 (dd,  $J=3.7$ , 11.7 Hz, 1 H), 4.28 (m, 1 H), 3.67 (m, 1 H), 2.17 (t,  $J=7.4$  Hz, 2 H), 1.57 (m, 2 H), 1.51 (m, 2 H), 1.23 (m, 44 H), 0.85 (t,  $J=6.7$  Hz, 3 H);  $^{13}\text{C}$  NMR (90 MHz,  $\text{CDCl}_3$ )  $\delta$ : 173.5, 149.1, 136.4, 133.2, 129.6, 128.4, 72.6, 63.4, 53.1, 36.8, 34.0, 31.8, 29.6, 29.3, 26.0, 25.7, 22.6, 14.0; IR  $\nu_{\text{max}}$  (KBr) 3284, 2922, 2851, 1730, 1640, 1552, 1465, 1278, 1120, 1073, 705  $\text{cm}^{-1}$ .

To a solution of 40.8 mg (0.066 mmol) of the monobenzoylelated sphinganine and 38.5  $\mu\text{L}$  (0.33 mmol, 5 equiv) of 2,6-lutidine in 2.0 mL of THF was added 53.5  $\mu\text{L}$  of TIPSTf (0.20 mmol), dropwise, at  $0^\circ\text{C}$ . The reaction mixture was then stirred for 15 min at  $0^\circ\text{C}$  and warmed to room temperature for 2.5 h. Removal of solvent under reduced pressure, followed by column chromatography ( $\text{SiO}_2$ , 25g, hexane/EtOAc, 10/1, v/v) afforded

39.5 mg (77%) of **6** having  $R_f$  0.56 (hexane/EtOAc, 4/1, v/v);  $^1\text{H}$  NMR (360 MHz,  $\text{CDCl}_3$ )  $\delta$ : 7.99 (d,  $J=7.2$  Hz, 2 H), 7.52 (t,  $J=7.7$  Hz, 1 H), 7.39 (t,  $J=7.2$  Hz, 2 H), 5.88 (d,  $J=5.9$  Hz, 1 H), 4.4 (m, 3 H), 4.01 (t,  $J=7.2$  Hz, 1 H), 2.10 (m, 2 H), 1.62 (m, 2 H), 1.55 (m, 2 H), 1.23 (m, 42 H), 1.04 (m, 21 H), 0.85 (t,  $J=6.8$  Hz, 6 H);  $^{13}\text{C}$  NMR (90 MHz,  $\text{CDCl}_3$ )  $\delta$ : 172.5, 166.8, 132.9, 129.7, 128.3, 74.4, 62.6, 50.9, 37.0, 34.9, 31.9, 29.6, 29.3, 25.6, 25.3, 22.6, 18.2, 14.0, 12.8; IR  $\nu_{\text{max}}$  (KBr) 3272, 2920, 2852, 1726, 1639, 1555, 1467, 1268, 1113, 883, 709  $\text{cm}^{-1}$ . HRMS for  $\text{C}_{48}\text{H}_{90}\text{NO}_4\text{Si}$  Calcd: 772.6639. Found: 772.6663

***N*-Myristoyl-*N'*-tert-butyloxycarbonyl-3-*O*-TIPS-*D*-erythro-sphinganine (7).** To a solution of 168.3 mg (0.22 mmol) of **6** in 2 mL of  $\text{CH}_2\text{Cl}_2$  was added a solution of NaOMe in MeOH [2.0 mg of Na (0.08 mmol) in 0.5 mL of anhydrous MeOH]. After stirring for 14 h at room temperature, the mixture was diluted with  $\text{Et}_2\text{O}$  and passed through 15 g of silica gel by washing with  $\text{Et}_2\text{O}$  several times. The solvent was removed under reduced pressure, and the residue purified by column chromatography ( $\text{SiO}_2$ , 15 g, hexane/EtOAc, 10/1 to 4/1, v/v) to give 112.5 mg (77%) of the corresponding primary alcohol as colorless oil having  $R_f$  0.21 (hexane/EtOAc, 4/1, v/v);  $^1\text{H}$  NMR (360 MHz,  $\text{CDCl}_3$ )  $\delta$ : 6.33 (d,  $J=7.2$  Hz, 1 H), 3.8–4.1 (m, 3 H), 3.58 (dd,  $J=2.9$ , 10.8 Hz, 1 H), 2.18 (t,  $J=7.5$  Hz, 2 H), 1.61 (m, 4 H), 1.23 (m, 45 H), 1.06 (m, 21 H), 0.86 (t,  $J=6.8$  Hz, 6 H);  $^{13}\text{C}$  NMR (90 MHz,  $\text{CDCl}_3$ )  $\delta$ : 173.1, 62.2, 52.2, 36.8, 34.9, 31.9, 29.6, 29.3, 25.5, 25.3, 22.6, 18.1, 14.0, 12.6; IR  $\nu_{\text{max}}$  (KBr) 3295, 2952, 2850, 1643, 1557, 1467, 1120, 1061  $\text{cm}^{-1}$ .

To a suspension of 92.5 mg (1.96 mmol) of imidazole in 2.0 mL of toluene was added 62.0  $\mu\text{L}$  of  $\text{PCl}_3$  (0.41 mmol) dropwise at  $0^\circ\text{C}$ . After stirring the mixture for 15 min at  $0^\circ\text{C}$ , 152.0  $\mu\text{L}$  of  $\text{Et}_3\text{N}$  (1.09 mmol) was added dropwise over 5 min. After an additional 15 min of stirring, a solution of 91.0 mg (0.136 mmol) of the debenzoylated form of **6** in 2.0 mL of toluene was added, dropwise, over 5 min at  $0^\circ\text{C}$ , using 1 mL of toluene as a rinse. After 2 h of stirring at  $0^\circ\text{C}$ , 0.5 mL of  $\text{H}_2\text{O}$  was added to quench the product mixture. The mixture was then diluted with EtOAc, washed with 30 mL of  $\text{H}_2\text{O}$ , 30 mL of saturated NaCl, dried over  $\text{Na}_2\text{SO}_4$ , and concentrated under reduced pressure. The residue was dried azeotropically with toluene several times, and then dissolved in 10 mL of pyridine. To this mixture was added 66.0 mg (0.408 mmol) of *N*-(tert-butoxycarbonyl)ethanolamine, followed by 84  $\mu\text{L}$  (0.68 mmol) of pivaloyl chloride. The resulting solution then stirred at room temperature for 1.5 h. To the reaction mixture was then added 34.5 mg (0.136 mmol) of  $\text{I}_2$  and 1.5 mL of  $\text{H}_2\text{O}$ . After stirring for 1.5 h at room temperature, a saturated solution of  $\text{Na}_2\text{S}_2\text{O}_3$  was added to quench the reaction.

The product mixture was diluted with  $\text{CH}_2\text{Cl}_2$ , washed with 40 mL of saturated  $\text{Na}_2\text{S}_2\text{O}_3$ , 40 mL of saturated NaCl, dried over  $\text{Na}_2\text{SO}_4$ , and concentrated under reduced pressure. Purification by column chromatography ( $\text{SiO}_2$ , 15 g,  $\text{CHCl}_3/\text{CH}_3\text{OH}$ , 20/1 and  $\text{CHCl}_3/\text{CH}_3\text{OH}/\text{H}_2\text{O}$ , 65/25/1, v/v/v) yielded 61.7 mg (51%) of **7** as a colorless oil having  $R_f$  0.58 ( $\text{CHCl}_3/\text{CH}_3\text{OH}/\text{H}_2\text{O}$ , 13/6/1, v/v/v);  $^1\text{H}$  NMR (360 MHz,  $\text{CDCl}_3$ )  $\delta$ : 4.10 (brs, 1 H), 4.02 (brs, 1 H), 3.94 (brs, 1 H), 3.81 (brs, 3 H), 3.20 (brs, 2 H), 2.15 (m, 2 H), 1.52 (brs, 4 H), 1.39 (s, 9 H), 1.22 (m, 44 H), 1.03 (m, 21 H), 0.85 (t,  $J=7$  Hz, 6 H);  $^{13}\text{C}$  NMR (90 MHz,  $\text{CDCl}_3$ )  $\delta$ : 174.0, 156.3, 78.6, 73.5, 64.9, 63.8, 53.0, 41.3, 36.8, 34.4, 31.9, 29.7, 29.3, 28.4, 25.7, 24.8, 22.6, 18.2, 14.0, 12.8;  $^{31}\text{P}$  NMR (145 MHz,  $\text{CDCl}_3$ )  $\delta$ : 0.08; IR  $\nu_{\text{max}}$  (KBr) 3432, 2926, 2857, 1691, 1643, 1523, 1463, 1245, 1104, 1065  $\text{cm}^{-1}$ . HRMS for  $\text{C}_{48}\text{H}_{98}\text{N}_2\text{O}_8\text{PSiNa}_2$  Calcd: 935.6626. Found: 935.6582.

***N*-[3-(2-Pyridyldithio)propionyl]-*D*-erythro-sphinganine(8).** To a solution of **7** (376.4 mg, 0.42 mmol) in 10.0 mL of  $\text{CH}_2\text{Cl}_2$  and 2 mL of  $\text{CH}_3\text{CN}$ , which was added 50 drops (ca. 2.5 mL) of HF-Pyr complex. The mixture was stirred for 1 h at room temperature, and passed through 20 g of silica using  $\text{CHCl}_3/\text{CH}_3\text{OH}$  (20/1, v/v) and  $\text{CHCl}_3/\text{CH}_3\text{OH}/\text{H}_2\text{O}$ , (13/6/1,

v/v/v). The organic layer was concentrated under reduced pressure, and the residue was then dissolved in 10 mL of CH<sub>2</sub>Cl<sub>2</sub>, followed by addition of 1 mL of trifluoroacetic acid. The reaction mixture was stirred for an additional 1 h at room temperature, and the solvent then removed under reduced pressure. The crude product was dried, azeotropically, with MeOH and toluene several times prior to the next reaction. The crude oil was then dissolved in 10 mL of CHCl<sub>3</sub>, and 0.75 mL of Et<sub>3</sub>N (5.4 mmol) added, followed by addition of a solution made from 167.7 mg (0.46 mmol) of *N*-[O-1,2,3-benzotriazin-4(3H)one-yl]-3-(2-pyridyldithio)propionate [BPDP] plus 3 mL of CHCl<sub>3</sub>, using 2 mL of CHCl<sub>3</sub> as a rinse. The reaction mixture was stirred for 15 h, diluted with CHCl<sub>3</sub>, washed with 50 mL of saturated aqueous NaHCO<sub>3</sub>, 50 mL of saturated NaCl, dried over Na<sub>2</sub>SO<sub>4</sub>, and concentrated under reduced pressure. Subsequent purification by column chromatography (SiO<sub>2</sub>, 25 g, CHCl<sub>3</sub>/CH<sub>3</sub>OH, 20/1 to CHCl<sub>3</sub>/CH<sub>3</sub>OH/H<sub>2</sub>O, 13/6/1, v/v/v), followed by preparative TLC (Merck, SiO<sub>2</sub>, 2 mm, 20×20 cm, CHCl<sub>3</sub>/CH<sub>3</sub>OH/H<sub>2</sub>O, 65/25/1, v/v/v) afforded 198.3 mg (56%, 3 steps) of **8** as a colorless oil having R<sub>f</sub> 0.57 (CHCl<sub>3</sub>/CH<sub>3</sub>OH/H<sub>2</sub>O, 13/6/1, v/v/v); <sup>1</sup>H NMR (360 MHz, CDCl<sub>3</sub>/CD<sub>3</sub>OD, 1/1) δ 8.36 (m, 1 H), 7.81 (m, 1 H), 7.74 (m, 1 H), 7.15 (t, *J*=5.8 Hz, 1 H), 4.21 (m, 1 H), 3.88 (m, 2 H), 3.80 (m, 2 H), 3.59 (m, 1 H), 3.40 (m, 2 H), 3.03 (t, *J*=7.1 Hz, 2 H), 2.60 (t, *J*=7.1 Hz, 2 H), 2.18 (t, 6.6 Hz, 2 H), 1.57 (m, 2 H), 1.49 (m, 2 H), 1.22 (m, 46 H), 0.84, (t, *J*= 7.5 Hz, 6 H); <sup>13</sup>C NMR (90 MHz, CDCl<sub>3</sub>/CD<sub>3</sub>OD, 1/1) δ 174.5, 172.5, 160.6, 149.7, 138.5, 121.7, 120.6, 70.1, 65.2, 64.6, 54.8, 40.8, 36.9, 35.6, 34.9, 34.0, 32.5, 30.2, 30.0, 29.9, 26.6, 26.4, 23.2, 14.3. <sup>31</sup>P NMR (145 MHz, CDCl<sub>3</sub>/CD<sub>3</sub>OD, 1/1) δ: 4.99; IR ν<sub>max</sub> (KBr) 3289, 2919, 2849, 1647, 1554, 1468, 1419, 1232, 1006 cm<sup>-1</sup>. HRMS for C<sub>42</sub>H<sub>77</sub>N<sub>3</sub>O<sub>7</sub>PS<sub>2</sub>Na<sub>2</sub> Calcd: 876.4736. Found: 876.4698.

**Sphingolipid Homodimer 1.** To a solution of 89.5 mg (0.72 mmol) of dithiothreitol (DTT) in 5.0 mL of CHCl<sub>3</sub> was added a solution of 30 mg (0.036 mmol) of **8** in 2.0 mL of CHCl<sub>3</sub>, dropwise at 0°C under a nitrogen atmosphere. The reaction mixture was stirred for 30 min at 0°C and the solvent was then removed under reduced pressure. The resulting thiol monomer was purified by column chromatography (SiO<sub>2</sub>, 5 g, CHCl<sub>3</sub>/CH<sub>3</sub>OH, 20/1 to CHCl<sub>3</sub>/CH<sub>3</sub>OH/H<sub>2</sub>O, 13/6/1, v/v/v), and then by preparative TLC (Merck, SiO<sub>2</sub>, 0.5 mm, 20×20 cm, CHCl<sub>3</sub>/CH<sub>3</sub>OH/H<sub>2</sub>O, 13/6/1, v/v/v). The resulting thiol monomer was dissolved in 3 mL of CHCl<sub>3</sub>, and a solution of 33 mg (0.04 mmol) of **8** in 2.5 mL of CHCl<sub>3</sub> was added dropwise at room temperature; 1.0 mL of CHCl<sub>3</sub> was used as a rinse. The mixture was stirred for 18 h, concentrated under reduced pressure and the residue purified by preparative TLC (Merck, SiO<sub>2</sub>, 0.5 mm, 20×20 cm, CHCl<sub>3</sub>/CH<sub>3</sub>OH/H<sub>2</sub>O, 13/6/1, v/v/v) to give 22.8 mg (44%) of **1** as a colorless oil having R<sub>f</sub> 0.48 (CHCl<sub>3</sub>/CH<sub>3</sub>OH/H<sub>2</sub>O, 13/6/1, v/v/v); <sup>1</sup>H NMR (360 MHz, CDCl<sub>3</sub>/CD<sub>3</sub>OD, 1/1, v/v) δ 4.06 (m, 2 H), 3.80 (m, 8 H), 3.50 (m, 2 H), 3.36 (m, 4 H), 2.90 (m, 4 H), 2.55 (m, 4 H), 2.13 (m, 4 H), 1.52 (m, 4 H), 1.45 (m, 4 H), 1.18 (m, 92 H), 0.80 (t, *J*=6.6 Hz, 12 H). <sup>13</sup>C NMR (90 MHz, CDCl<sub>3</sub>/CD<sub>3</sub>OD (1/1), δ 175.1, 173.0, 70.2, 65.2, 64.6, 54.6, 40.7, 36.9, 35.9, 34.5, 34.0, 32.4, 30.2, 29.8, 26.5, 26.3, 23.1, 14.3; <sup>31</sup>P NMR (145 MHz, CDCl<sub>3</sub>/CD<sub>3</sub>OD, 1/1, v/v) δ 3.16; IR ν<sub>max</sub> (KBr) 3420, 3300, 2923, 2854, 1646, 1555, 1466, 1242, 1103, 1068 cm<sup>-1</sup>. HRMS for C<sub>74</sub>H<sub>147</sub>N<sub>4</sub>O<sub>14</sub>P<sub>2</sub>S<sub>2</sub>Na<sub>2</sub> Calcd: 1487.9620. Found: 1487.9674.

**Heterodimer 4.** Using procedures similar to those used for the synthesis of **1**, the corresponding heterodimer (**4**) was prepared by reacting **8** with 1 equiv of the thiol monomer of **2** in 47 % isolated yield, having R<sub>f</sub> 0.50 (CHCl<sub>3</sub>/MeOH/H<sub>2</sub>O, 13/6/1, v/v/v); <sup>1</sup>H-NMR (360 MHz, CDCl<sub>3</sub>/CD<sub>3</sub>OD, 1/1) δ: 5.19 (m, 1 H), 4.40 (d, *J*=10.0 Hz, 1 H), 4.14 (m, 2 H), 3.8-4.1 (m, 8 H), 3.59 (m, 1 H), 3.40 (m, 4 H), 2.92 (t, *J*=6.8 Hz, 4 H), 2.59 (t, *J*=7.0 Hz, 4 H),

2.28 (dd, *J*=7.3, 12.4 Hz, 4 H), 2.18 (t, *J*=7.4 Hz, 2 H), 1.53 (m, 8 H), 1.22 (m, 102 H), 0.85 (t, *J*=6.9 Hz, 12 H); <sup>13</sup>C NMR (90 MHz, CDCl<sub>3</sub>/CD<sub>3</sub>OD, 1/1) δ: 175.3, 174.5, 174.2, 173.1, 70.9, 70.3, 65.5, 64.9, 64.4, 63.1, 54.7, 40.7, 36.9, 36.1, 34.6, 34.1, 32.5, 30.2, 29.9, 29.7, 26.6, 26.3, 25.4, 23.2, 14.3. <sup>31</sup>P NMR (145 MHz, CDCl<sub>3</sub>/CD<sub>3</sub>OD, 1/1) δ: 3.44, 2.37. IR ν<sub>max</sub> (KBr) 3292, 2920, 2853, 1741, 1653, 1558, 1468, 1238, 1099, 1066 cm<sup>-1</sup>. HRMS for C<sub>81</sub>H<sub>157</sub>N<sub>3</sub>O<sub>16</sub>P<sub>2</sub>S<sub>2</sub>Na<sub>3</sub><sup>+</sup> Calcd: 1623.0168. Found: 1623.0204
